# Supplementary material for: Integrated transcriptome and single-cell sequencing reveals M2-like tumor-associated macrophages-related prognostic signatures in breast cancer
Source: Research Square preprint supplement (doi:10.21203/rs.3.rs-5236065/v1), 2024-10-23
Supplement: Supplementary file 1 [file 5ad50689c274c00dcdc80ca0.pdf]

# Integrated transcriptome and single-cell sequencing reveals M2-like tumor-associated macrophages-related prognostic signatures in breast cancer

Haochen Xuyang<sup>1</sup>, Peiyan Lin<sup>2</sup>, Ye Zhu<sup>1</sup>, Qin Zhang<sup>2</sup>, Jinghong Zhou<sup>2</sup>

<sup>1</sup> Department of Bioinformatics, Hangzhou Juno Genomics, Hangzhou, China; <sup>2</sup> Department of Gynecology, Zhejiang Hospital, Hangzhou, China

\* Correspondence:

Jinghong Zhou

zhoujh2440@126.com

## Supplementary Information

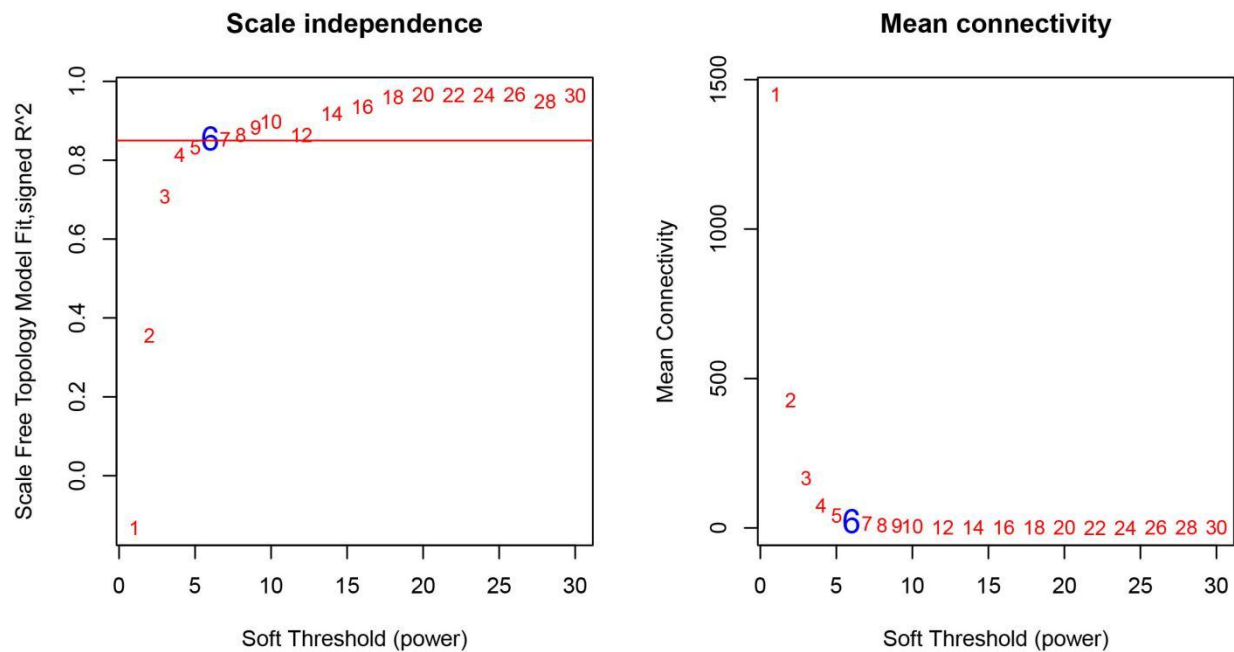

**Figure S1.** Screening of the optimal soft threshold by pickSoftThreshold function.

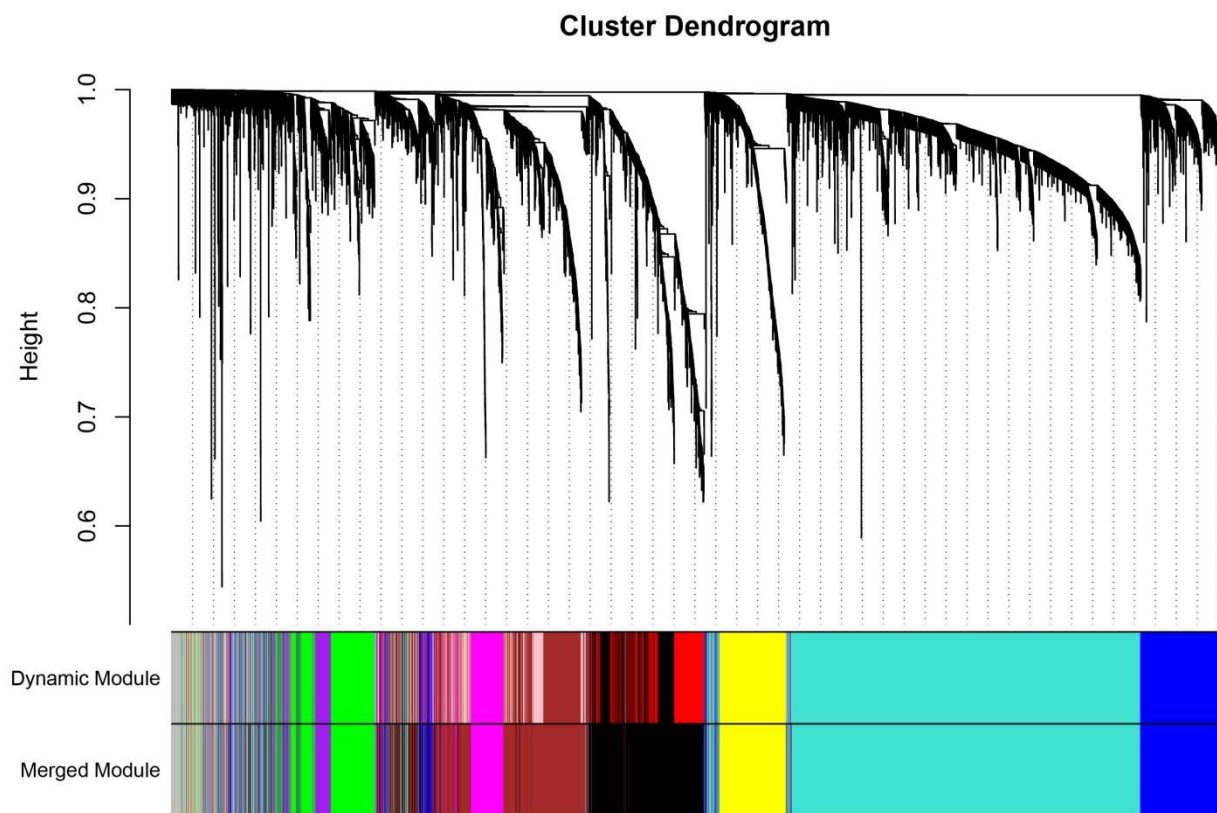

**Figure S2.** Gene dendrogram and module colors.
